# Supplementary material for: Feasibility and Operational Lessons from Active Tuberculosis Disease Screening Among Ukrainian Refugees in Barcelona: A Pilot Study
Source: Research Square preprint supplement (doi:10.21203/rs.3.rs-8077431/v1), 2025-12-17
Supplement: Supplementary file 1 [file 74a6bc39e96e35657dff65d6.docx]

**Additional File 1**

**Table 1: Checklist of Questionnaire Content: Individual Information, active TB disease Symptoms and procedural questions**

| Type of question | Question | Response |
| --- | --- | --- |
| Procedural question* | Surveillance Unit corresponding to the place where the patient lives | Open-ended |
| Screening place | Multiple choice |
| Team who’s filling the questionnaire | Open-ended |
| Name and surname | Open-ended |
| ID number** | Open-ended |
| Demographics | Age | Open-ended |
| Sex | Multiple choice |
| Phone number | Open-ended |
| Patient’s risk group | Multiple choice |
| Does the patient have any additional risk factors, such as chronic respiratory disease, diabetes, smoking, malnutrition, chronic renal insufficiency, immunodeficiency, advanced age, or pregnancy? | Multiple choice |
| Country of origin | Multiple choice |
| When did you come to Catalonia/Barcelona? | MM/YYYY |
| Since you are in Barcelona, how many times have you travelled to your country of origin? | Open-ended |
| TB symptoms | Do you have any symptoms? | Yes/No |
| Which of the following symptoms have you experienced in the past two weeks? | |
| Cough for more than 2 weeks | Yes/No |
| Subfebrile temperature or fever | Yes/No |
| Night sweats | Yes/No |
| Weight loss | Yes/No |
| Chills | Yes/No |
| When did these symptoms start? | DD/MM/YYYY |
| Procedural question* | Is this patient being referred to the TB Unit? | Yes/No |
| TB Unit responsible for the TB patient. | Open-ended |
| Has the individual been referred for an additional diagnostic session for a CXR scan? | Yes/No |
| Has the CXR been performed? | Yes/No |
| CXR result | Open-ended |
| Has the patient been diagnosed with TB? | Yes/No |
| Has any microbiological sampling been made? (ZN, culture, GeneXpert®) | Yes/No |
| Has the TB been microbiologically confirmed? | Yes/No |
| Has additional microbiological sampling been done for other infectious diseases | Multiple choice |
| Has this patient previously received TB treatment? | Yes/No |
| If yes, when did the treatment start? | DD/MM/YYYY |
| Did this treatment finish successfully? | Yes/No |
| If TB is confirmed, has a contact study been conducted? | Yes/No |
| If the study of the contacts was made, how many people have been screened? | Open-ended |
| *Depending on the procedure, the questions are completed either by interviewers or by employees of the Public Health Agency of Barcelona.  **The ID number requested refers to any available identifier provided by the respondent, such as a national ID, passport number, or any other relevant identification number.  CXR: chest X-ray, TB: tuberculosis, ZN: Ziehl–Neelsen stain.  Questions related to TB symptoms were developed according to the WHO-recommended sequential positive serial screening algorithm [1]. Additional demographic and procedural items were designed by the working group and adapted to the local context | | |


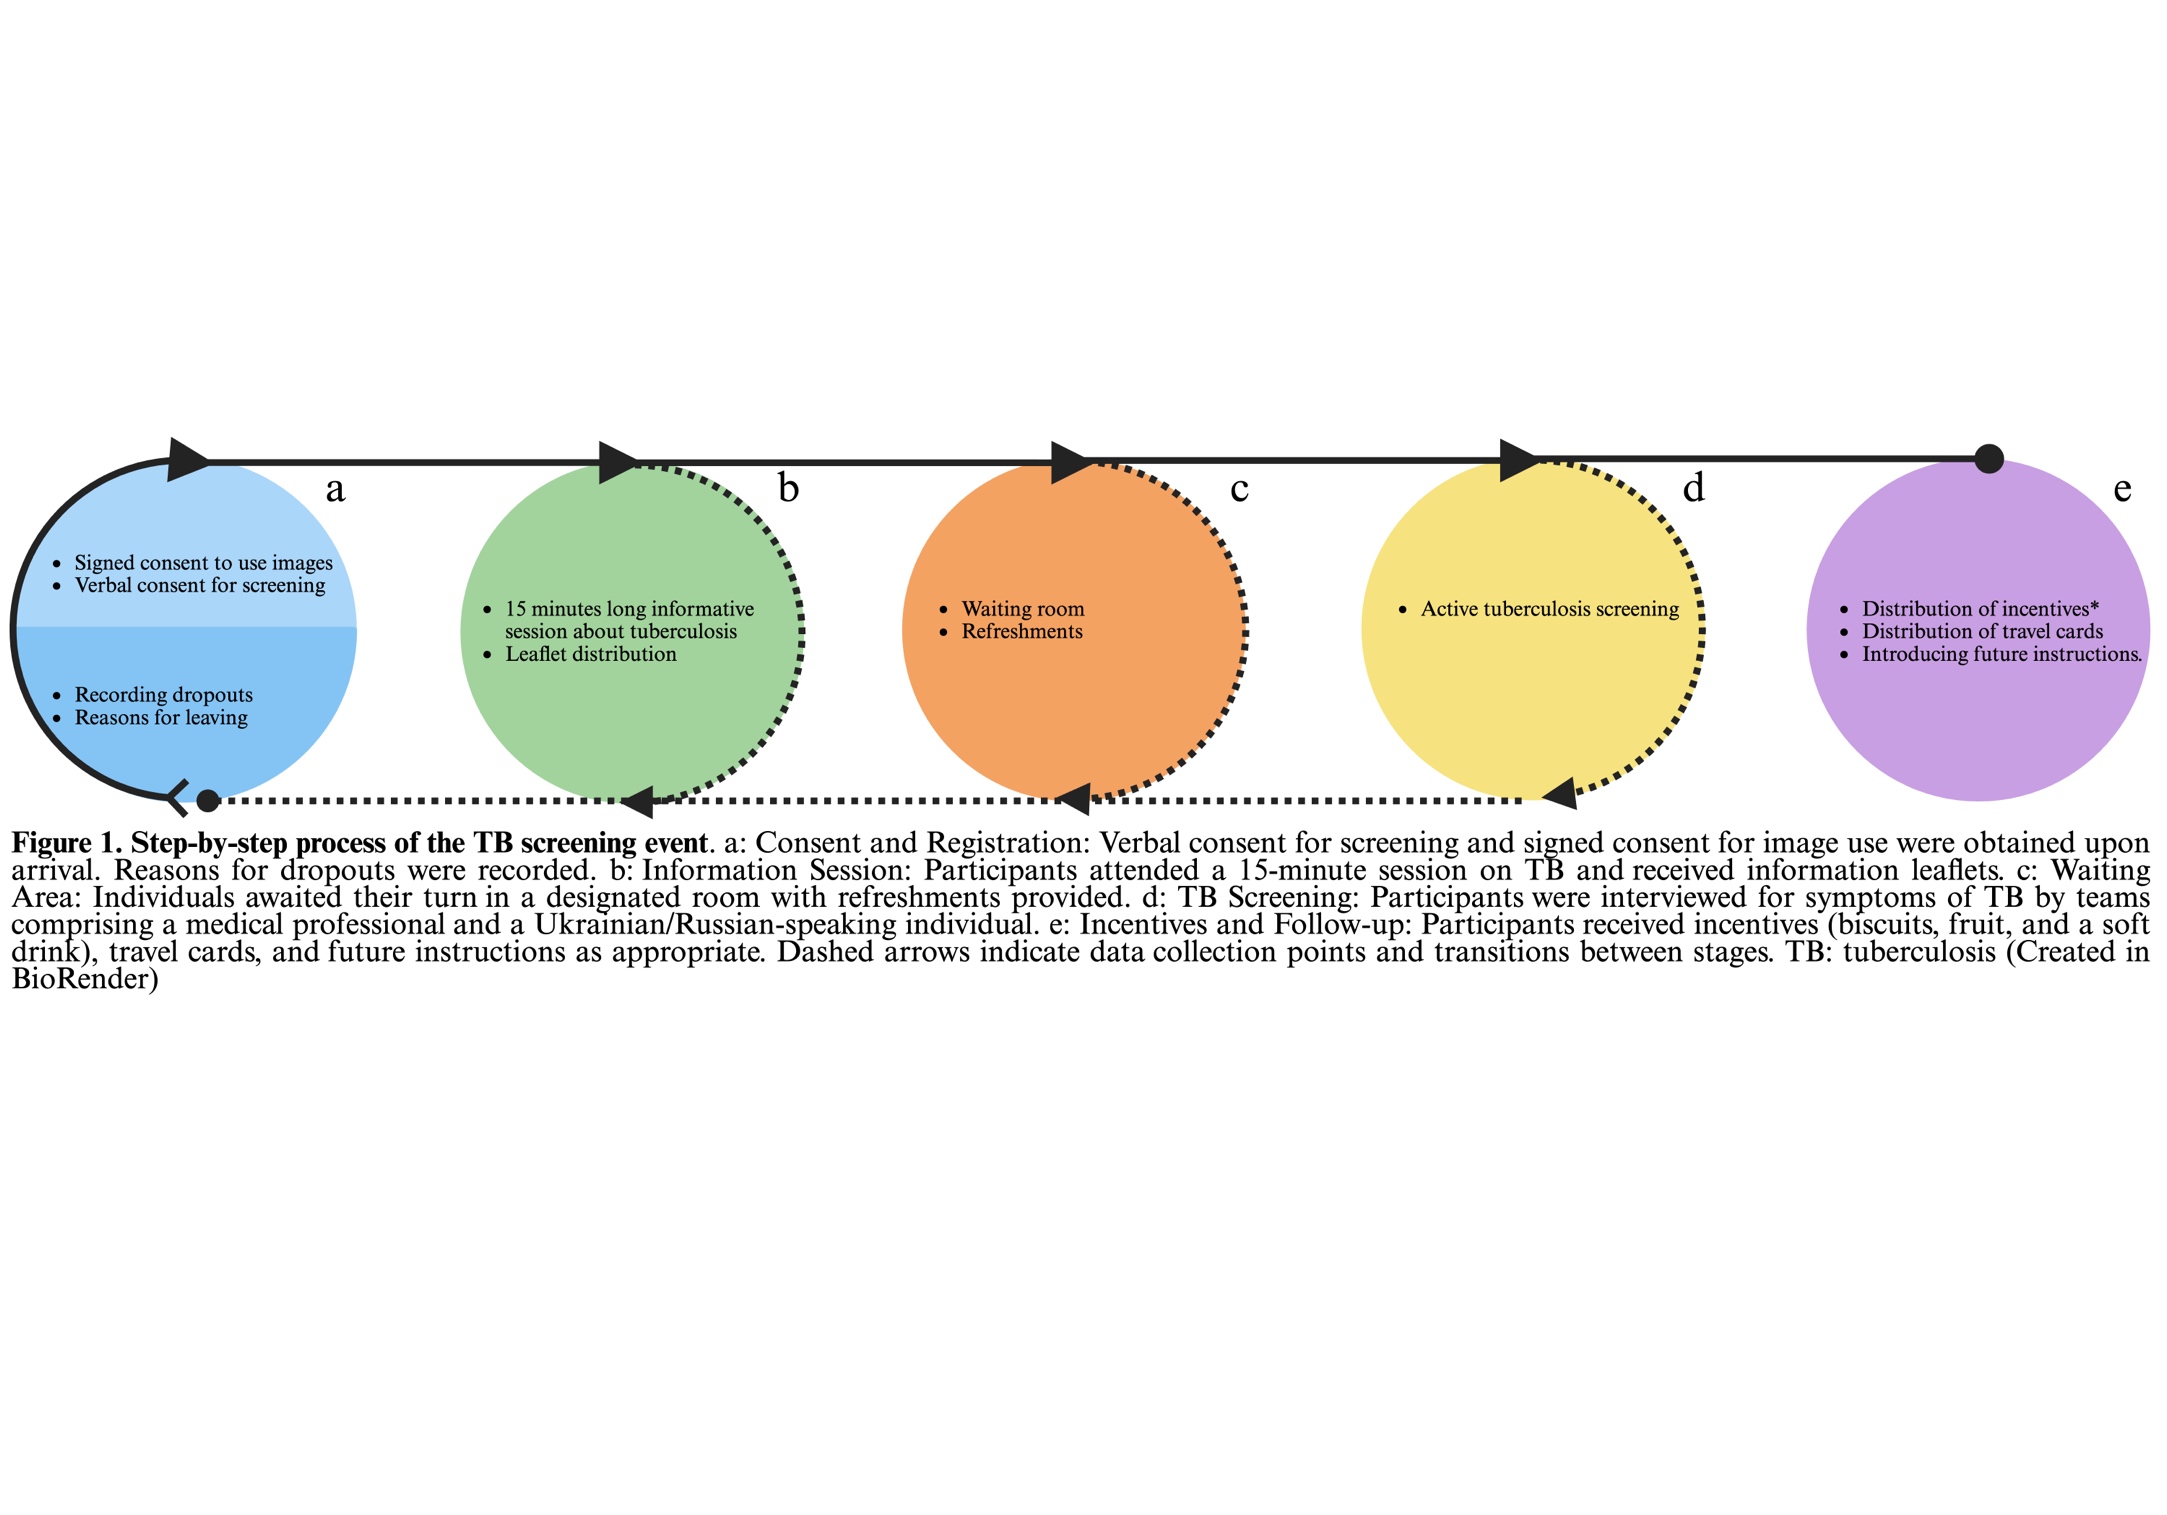


References:

1. WHO operational handbook on tuberculosis. Module 2: screening - systematic screening for tuberculosis disease. Geneva: World Health Organization; 2021. Licence: CC BY-NC-SA 3.0 IGO. Available at: https://www.who.int/publications/i/item/9789240022614
